# Supplementary material for: Revisiting the Importance of Orthobunyaviruses for Animal Health: A Scoping Review of Livestock Disease, Diagnostic Tests, and Surveillance Strategies for the Simbu Serogroup
Source: MDPI journal article supplement (doi:10.3390/v16020294), 2024-02-15
Supplement: s1 [file s1]

1. ("Bunyavir\*" OR "orthobunyavirus\*") AND ("Shamonda\*" OR "Simbu\*")

2. ("Bunyavir\*" OR "orthobunyavirus" OR "Akabane" OR "Tinaroo" OR "Yaba-7" OR "Jatobal" OR "Buttonwillow" OR "Cat Que" OR "Ingwavuma" OR "Inini" OR "Manzanilla" OR "Mermet" OR "Facey's paddock" OR "Iquitos" OR "Madre de Dios" OR "Oropouche" OR "Perdoes" OR "Pintupo" OR "Utinga" OR "Utive" OR "Douglas" OR "Sango" OR "Sathuperi" OR "Peaton" OR "Schmallenberg" OR "Shamonda" OR "Sabo" OR "Aino" OR "Kaikalur" OR "Shuni" OR "Oya" OR "Para" OR "Simbu" OR "Thimiri") AND ("bovine" OR "cattle" OR "cow" OR "calf" OR "calves" OR "dairy" OR "beef" OR "ovine" OR "sheep" OR "caprine" OR "goat" OR "equine" OR "horse" OR "porcine" OR "pig" or "pork")
