# Supplementary material for: Revisiting the Importance of Orthobunyaviruses for Animal Health: A Scoping Review of Livestock Disease, Diagnostic Tests, and Surveillance Strategies for the Simbu Serogroup
Source: MDPI journal article supplement (doi:10.3390/v16020294), 2024-02-15
Supplement: s1 [file s1]

| Named virus         | Challenge type (route)                                  | Host Species | Case presentation and signalment                                                           | Microscopic descriptions                                                                                                                                                                                                                   |                                         |                                                                   | Ref. |
|---------------------|---------------------------------------------------------|--------------|--------------------------------------------------------------------------------------------|--------------------------------------------------------------------------------------------------------------------------------------------------------------------------------------------------------------------------------------------|-----------------------------------------|-------------------------------------------------------------------|------|
|                     |                                                         |              |                                                                                            | Brain                                                                                                                                                                                                                                      | Spinal cord                             | Skeletal muscle                                                   |      |
| Peaton virus        | Natural (in-utero)                                      | Bovine       | Aborted, malformed calf<br>Japanese Black bull × Holstein cow.<br>Gestational age 285 days | No description provided                                                                                                                                                                                                                    | No description provided                 | Loss of skeletal muscle fibres accompanied by adipose replacement | [1]  |
| Shuni virus         | Experimental (subcutaneous)                             | Bovine       | 7-11 months old calves                                                                     | Mild to moderate, nonsuppurative meningoencephalitis.<br>- Perivascular cuffs<br>- Glial nodule formation                                                                                                                                  | Mild inflammatory changes               | No description provided                                           | [2]  |
| Shuni virus         | Natural                                                 | Bovine       | 5-month-old male Holstein-Friesian calf                                                    | Acute-subacute meningoencephalitis<br>- Perivascular cuffs<br>- Neutrophils, with few lymphocytes, infiltration of the cerebellar meninges<br>- Aggregates of lymphocytes and neutrophils in brain stem accompanied by white matter oedema | No description provided                 | No description provided                                           | [3]  |
| Shuni virus         | Natural                                                 | Bovine       | 16-month-old Holstein-Friesian heifer                                                      | Encephalitis<br>- Thick perivascular cuffs (macrophages and neutrophils)<br>- Cerebral and meningeal haemorrhages<br>- Diffuse, mild gliosis and rare micro-abscesses accompanied by white matter oedema                                   | No description provided                 | No description provided                                           | [3]  |
| Schmallenberg virus | Experimental (subcutaneous)                             | Ovine        | 4 months old Charollais sheep                                                              | No lesions were observed                                                                                                                                                                                                                   | No lesions were observed                | No lesions were observed                                          | [4]  |
| Schmallenberg virus | Experimental (subcutaneous)                             | Bovine       | 6 month old Holstein calves                                                                | Non-specific lesions<br>- Focal gliosis in the brain stem with another region of hypercellularity<br>- Cerebral perivascular cuffing with mononuclear cells with no evidence of vasculitis                                                 | No lesions were observed                | No lesions were observed                                          | [4]  |
| Schmallenberg virus | Experimental (in-utero, day 28 and day 42 of pregnancy) | Caprine      | Stillborn animals Alpine/Saanen                                                            | Porencephaly associated with multiple foci of haemorrhage.                                                                                                                                                                                 | No lesions were observed                | No lesions were observed                                          | [5]  |
| Shamonda virus      | Natural (in-utero)                                      | Bovine       | Aborted, malformed foetuses and stillborn animals - delivered at or beyond term.           | Lesions in the cerebrum and brain stem<br>- Calcification of nerve cells<br>- Perivascular infiltration of mononuclear cells<br>- Gliosis                                                                                                  | Severe degeneration in the ventral horn | Fatty replacement, atrophy, myositis                              | [6]  |

|                     |                       |         |                                                                       |                                                                                                                                                                                                                                                                                                          |                                                                                                                                                                                                                                               |                                                                                                                                                                                                                             |      |
|---------------------|-----------------------|---------|-----------------------------------------------------------------------|----------------------------------------------------------------------------------------------------------------------------------------------------------------------------------------------------------------------------------------------------------------------------------------------------------|-----------------------------------------------------------------------------------------------------------------------------------------------------------------------------------------------------------------------------------------------|-----------------------------------------------------------------------------------------------------------------------------------------------------------------------------------------------------------------------------|------|
|                     |                       |         | Gestation age:<br>275–299 days                                        |                                                                                                                                                                                                                                                                                                          |                                                                                                                                                                                                                                               |                                                                                                                                                                                                                             |      |
| Schmallenberg virus | Natural<br>(in-utero) | Bovine  | Aborted,<br>malformed<br>foetuses and<br>stillborn animals            | <ul style="list-style-type: none"> <li>- cerebellar and cerebral hypoplasia,</li> <li>- meningeal fibrosis,</li> <li>- porencephaly</li> <li>- micromyelia and lack of neurons</li> <li>- demyelination without inflammation.</li> </ul>                                                                 | Micromyelia, lack of neurons<br>in the dorsal horns                                                                                                                                                                                           | <ul style="list-style-type: none"> <li>- Myofibrillar hypoplasia</li> <li>- Loss of skeletal muscle fibres replaced by myxoid tissue</li> </ul>                                                                             | [7]  |
| Schmallenberg virus | Natural<br>(in-utero) | Bovine  | Aborted and<br>malformed foetus<br>(female calf,<br>Charolais hybrid) | <ul style="list-style-type: none"> <li>- Cerebrum: moderate microgliosis</li> <li>- Cerebellum: <ul style="list-style-type: none"> <li>o Reduced thickness to the molecular layer</li> <li>o Loss of Purkinje cells</li> </ul> </li> </ul>                                                               | <ul style="list-style-type: none"> <li>- Cervical: devoid of grey and white matter</li> <li>- Thoracic: lateral symmetrical demyelination (reduced grey matter)</li> <li>- Lumbar: inadequate development of grey and white matter</li> </ul> | <ul style="list-style-type: none"> <li>- Severe myofibrillar hypoplasia</li> <li>- Loss of skeletal muscle fibres replaced with lipocytes and connective tissue</li> <li>- Dystrophic mineralisation of myocytes</li> </ul> | [8]  |
| Schmallenberg virus | Natural<br>(in-utero) | Bovine  | Aborted,<br>malformed<br>foetuses and<br>stillborn animals            | Limited to gross features: <ul style="list-style-type: none"> <li>- Porencephaly</li> <li>- Hydranencephaly</li> <li>- Hydrocephaly</li> </ul>                                                                                                                                                           | Decreased neurons                                                                                                                                                                                                                             | Increased fibre size variation with connective tissue and adipocyte infiltration                                                                                                                                            | [9]  |
| Akabane virus       | Natural               | Cattle  | 4 months to 6<br>year-old animals                                     | Moderate-to-severe non-suppurative meningoencephalomyelitis <ul style="list-style-type: none"> <li>- Perivascular infiltration of lymphocytes and histiocytes with fewer plasma cells</li> <li>- Multifocal gliosis</li> <li>- Neuronal necrosis</li> <li>- Neuronophagia</li> </ul>                     | <ul style="list-style-type: none"> <li>- Lymphohistiocytic perivascular cuffing,</li> <li>- Gliosis</li> <li>- Neuronal generation</li> </ul>                                                                                                 | No description provided                                                                                                                                                                                                     | [10] |
| Schmallenberg virus | Natural<br>(in-utero) | Bovine  | Aborted,<br>malformed<br>foetuses and<br>stillborn animals            | <ul style="list-style-type: none"> <li>- Mild, diffuse, lymphohistiocytic meningitis without perivascular or parenchymal infiltration of the brain</li> <li>- Neuronal necrosis and chromatolysis</li> <li>- mild to severe, diffuse astrogliosis and/or microgliosis</li> </ul>                         | Micromyelia, bilateral reduction of grey matter and white matter (reduced neurons in the ventral horns)                                                                                                                                       | Severe reduction of myofibrils with diminished myofiber diameter                                                                                                                                                            | [11] |
| Schmallenberg virus | Natural<br>(in-utero) | Ovine   | Aborted,<br>malformed<br>foetuses and<br>stillborn animals            | <ul style="list-style-type: none"> <li>- Perivascular infiltration of the grey and white matter (lymphohistiocytic)</li> <li>- Perivascular cuffs</li> <li>- Glial nodules</li> <li>- Neuronal necrosis and chromatolysis</li> <li>- mild to severe, diffuse astrogliosis and/or microgliosis</li> </ul> | No description provided                                                                                                                                                                                                                       | Severe reduction of myofibrils with diminished myofiber diameter                                                                                                                                                            | [11] |
| Schmallenberg virus | Natural<br>(in-utero) | Caprine | Aborted,<br>malformed<br>foetuses and<br>stillborn animals            | <ul style="list-style-type: none"> <li>- mild to severe, diffuse astrogliosis and/or microgliosis</li> </ul>                                                                                                                                                                                             | No description provided                                                                                                                                                                                                                       | No description provided                                                                                                                                                                                                     | [11] |

|               |                    |        |                                                                         |                                                                                                                                                                                                                                                                                                                                                                  |                                                                                                                                                                                                                                                  |                                                                                                                                                                                                                                                                    |      |
|---------------|--------------------|--------|-------------------------------------------------------------------------|------------------------------------------------------------------------------------------------------------------------------------------------------------------------------------------------------------------------------------------------------------------------------------------------------------------------------------------------------------------|--------------------------------------------------------------------------------------------------------------------------------------------------------------------------------------------------------------------------------------------------|--------------------------------------------------------------------------------------------------------------------------------------------------------------------------------------------------------------------------------------------------------------------|------|
| Akabane virus | Natural            | Bovine | 55 days to 15-month-old calves. (Japanese Black, Holstein, mixed breed) | Non-suppurative encephalitis <ul style="list-style-type: none"> <li>- Perivascular cuffing (lymphocytes and macrophages)</li> <li>- Diffuse gliosis</li> <li>- degeneration and/or necrosis of neurons</li> <li>- vacuolation of the neuropil</li> </ul>                                                                                                         | Ventral horn - neuronal necrosis and neuronophagia                                                                                                                                                                                               | Mild degeneration of skeletal muscle fibres                                                                                                                                                                                                                        | [12] |
| Akabane virus | Natural            | Bovine | 3 days to 4-month-old calves                                            | Moderate to severe lymphohistiocytic encephalomyelitis <ul style="list-style-type: none"> <li>- perivascular infiltration (mixed lymphocytes and histiocytes with fewer plasma cells)</li> <li>- Multifocal gliosis</li> <li>- Neuronal degeneration</li> <li>- Occasional neuronophagia</li> </ul>                                                              | Lymphohistiocytic perivascular cuffing, moderate gliosis and neuronal necrosis and loss were also observed in the spinal cord, mostly in the ventral horn grey matter                                                                            | Mild inflammatory reaction associated with muscle atrophy of limb muscle                                                                                                                                                                                           | [13] |
| Akabane virus | Natural            | Bovine | 2–7-year-old adult cows                                                 | <ul style="list-style-type: none"> <li>- moderate to severe perivascular infiltration of primarily lymphocytes and histiocytes with fewer plasma cells,</li> <li>- Mild perivascular lymphohistiocytic cuffing</li> <li>- Multifocal gliosis,</li> <li>- Neuronal necrosis,</li> <li>- Occasional neuronophagia with microglial cells and neutrophils</li> </ul> | <ul style="list-style-type: none"> <li>- lymphohistiocytic perivascular cuffing,</li> <li>- gliosis,</li> <li>- neuronal necrosis and loss</li> </ul> Inflammatory changes were more severe in the spinal cord than in the brain                 | Severely atrophic, with mucinous change in the stroma                                                                                                                                                                                                              | [14] |
| Akabane virus | Natural (in-utero) | Bovine | Stillborn animals                                                       | <ul style="list-style-type: none"> <li>- perivascular cuffs of lymphocytes, plasma cells and macrophages</li> <li>- diffuse and focal proliferation of glial cells</li> <li>- pyknosis of neuronal cells</li> <li>- vacuolation of neuropils</li> </ul>                                                                                                          | Bilaterally in the ventral horn: <ul style="list-style-type: none"> <li>- perivascular cuffing</li> <li>- diffuse and focal proliferation of glial cells</li> <li>- pyknosis of neuronal cells</li> <li>- decreased number of neurons</li> </ul> | No lesions were observed                                                                                                                                                                                                                                           | [15] |
| Akabane virus | Natural            | Bovine | 5-month-old bull calf                                                   | Severe lymphohistiocytic meningoencephalomyelitis <ul style="list-style-type: none"> <li>- perivascular infiltration of mononuclear cells</li> <li>- diffuse to multifocal gliosis</li> <li>- neuronal necrosis</li> </ul>                                                                                                                                       | Inflammatory changes in all regions: <ul style="list-style-type: none"> <li>- marked gliosis,</li> <li>- perivascular cuffing by mononuclear cells,</li> </ul> Neuronal necrosis in the bilateral ventral horns                                  | No lesions were observed                                                                                                                                                                                                                                           | [16] |
| Akabane virus | Natural            | Bovine | One day old calves                                                      | Severe lymphohistiocytic meningoencephalomyelitis <ul style="list-style-type: none"> <li>- perivascular infiltration of mononuclear cells</li> <li>- diffuse to multifocal gliosis</li> <li>- neuronal necrosis</li> </ul>                                                                                                                                       | Ventral horn grey matter: <ul style="list-style-type: none"> <li>- diffuse gliosis</li> <li>- perivascular cuffing with mononuclear cells</li> <li>- neuronal cell loss</li> </ul>                                                               | <ul style="list-style-type: none"> <li>- Severe diffuse atrophic or dysplastic muscles</li> <li>- myofibrillar hypoplasia</li> <li>- mucinous change in the stromal connective tissues.</li> <li>- Mild infiltration of small number of histiocytes and</li> </ul> | [16] |

|               |                                                  |        |                                                             |                                                                                                                                                                                                                                                                                                |                                                                                                                                                                    |                                                                                                                                                                                                 |      |
|---------------|--------------------------------------------------|--------|-------------------------------------------------------------|------------------------------------------------------------------------------------------------------------------------------------------------------------------------------------------------------------------------------------------------------------------------------------------------|--------------------------------------------------------------------------------------------------------------------------------------------------------------------|-------------------------------------------------------------------------------------------------------------------------------------------------------------------------------------------------|------|
|               |                                                  |        |                                                             |                                                                                                                                                                                                                                                                                                |                                                                                                                                                                    | neutrophils was found occasionally around blood vessels                                                                                                                                         |      |
| Aino virus    | Natural (in-utero)                               | Bovine | Aborted calf<br>Gestational age 187 days.                   | <ul style="list-style-type: none"> <li>- Necrotic foci with macrophages (gitter cells). The necrotic foci showed some calcification of neuronal cells</li> <li>- Multifocal lymphatic perivascular cuffing in the brain and meninges</li> </ul>                                                | No lesions were observed                                                                                                                                           | No lesions were observed                                                                                                                                                                        | [17] |
| Akabane virus | Natural (in-utero)                               | Bovine | 4-12 month-old dairy calves                                 | <ul style="list-style-type: none"> <li>- Non-suppurative encephalitis</li> <li>- Moderate perivascular infiltration</li> </ul>                                                                                                                                                                 | <ul style="list-style-type: none"> <li>- Neuronal degeneration</li> <li>- Neuronophages</li> </ul>                                                                 | <ul style="list-style-type: none"> <li>- muscle myofibers were discontinued or broken.</li> <li>- mild proliferation of satellite cells</li> <li>- myofiber degeneration and atrophy</li> </ul> | [18] |
| Akabane virus | Experimental (intracranial)                      | Bovine | A 2-day-old, Holstein calf and a 6-month-old, Holstein calf | <ul style="list-style-type: none"> <li>- Severe perivascular infiltration (lymphocytes)</li> <li>- Glial nodules in the grey matter</li> </ul>                                                                                                                                                 | Lesions more severe in the ventral horn than the dorsal horn<br><ul style="list-style-type: none"> <li>- Glial nodules</li> <li>- Neuronal degeneration</li> </ul> | No description provided                                                                                                                                                                         | [19] |
| Akabane virus | Experimental (in-utero, days 32-33 of pregnancy) | Ovine  | Sacrificed foetuses                                         | Day 9: Focal destruction of the brain cells<br><br>Day 21: Generalised destruction of the brain cells, with<br><ul style="list-style-type: none"> <li>- Necrosis</li> <li>- Mineralisation</li> <li>- Oedema</li> <li>- General disruption of the structure</li> </ul>                         | No description provided                                                                                                                                            | Day 21: necrosis, increased cellularity and disruption of cell structure                                                                                                                        | [20] |
| Akabane virus | Natural (In-utero, 0-280 days of pregnancy)      | Bovine | Malformed foetuses                                          | Diffuse, suppurative meningoencephalitis, with<br><ul style="list-style-type: none"> <li>- Necrosis</li> <li>- Suppuration and phagocytosis in the meninges and ventricular system</li> </ul>                                                                                                  | Mild depletion of ventral horn neurones, axons and myelin                                                                                                          | No description provided                                                                                                                                                                         | [21] |
| Akabane virus | Natural (in-utero)                               | Ovine  | Malformed foetuses                                          | No description provided                                                                                                                                                                                                                                                                        | Neuronal loss in the ventral horn                                                                                                                                  | Severe skeletal muscle neurogenic atrophy and replacement by adipose tissue                                                                                                                     | [22] |
| Akabane virus | Natural (in-utero)                               | Bovine | Malformed foetuses                                          | <ul style="list-style-type: none"> <li>- Perivascular cuffing with histiocytes, plasma cells and lymphocytes</li> <li>- Gliosis</li> <li>- Nerve cell degeneration – chromatolysis</li> <li>- Necrotic foci with infiltration of lipid-laden macrophages</li> <li>- Cystic cavities</li> </ul> | Neurons were absent or sparse in the ventral horn                                                                                                                  | Dysplastic changes – tentatively termed:<br><ul style="list-style-type: none"> <li>- wuishokinsho (runt-muscle disease)</li> <li>- wuishokinzeni (runt-muscle fiber)</li> </ul>                 | [23] |
| Akabane virus | Experimental (in-utero, days 32-36 of pregnancy) | Ovine  | Sacrificed foetuses                                         | <ul style="list-style-type: none"> <li>- hypoplasia and degeneration</li> <li>- perivascular cuffing</li> <li>- cysts and malacia</li> <li>- gliosis</li> </ul>                                                                                                                                | <ul style="list-style-type: none"> <li>- Neurons were absent in the ventral horn</li> <li>- Myelination deficiency</li> <li>- Perivascular cuffing</li> </ul>      | Muscle neuronal atrophy and degeneration                                                                                                                                                        | [24] |

|               |                                                  |        |                                                      |                                                                                                                                                                                                                                                                                                                                                 |                                                                                                                                     |                                                                                                                                                                                                                 |      |
|---------------|--------------------------------------------------|--------|------------------------------------------------------|-------------------------------------------------------------------------------------------------------------------------------------------------------------------------------------------------------------------------------------------------------------------------------------------------------------------------------------------------|-------------------------------------------------------------------------------------------------------------------------------------|-----------------------------------------------------------------------------------------------------------------------------------------------------------------------------------------------------------------|------|
|               |                                                  |        |                                                      |                                                                                                                                                                                                                                                                                                                                                 | <ul style="list-style-type: none"> <li>- Gliosis</li> <li>- Oedema</li> <li>- Neuronal necrosis</li> <li>- Neuronophagia</li> </ul> |                                                                                                                                                                                                                 |      |
| Aino virus    | Natural (in-utero)                               | Bovine | Malformed newborn calves with neurologic dysfunction | Mild non-suppurative encephalitis <ul style="list-style-type: none"> <li>- lack of folial development of the cerebellum</li> <li>- Decreased width of the molecular layer</li> <li>- loss of Purkinje cells</li> <li>- loss of cells in the granular layer</li> </ul>                                                                           | No description provided                                                                                                             | No description provided                                                                                                                                                                                         | [25] |
| Akabane       | Experimental (in-utero, days 30-36 of pregnancy) | Ovine  | Sacrificed newborn lambs                             | Meninges – fused membranes with focal areas of necrotic debris and fibrous thickenings                                                                                                                                                                                                                                                          | Reduced size, marked reduction of myelination of the ventral cord and neurons were reduced in the ventral horn                      | Muscle bundles varied in size, and areas of atrophy and degeneration were present. There was a loose arrangement of mixed tissues, consisting of some adipose cells and fibrous tissues among the muscle cells. | [26] |
| Aino virus    | Experimental (intracerebral)                     | Bovine | 2-6 month old Japanese Brown X Holstein calves       | <ul style="list-style-type: none"> <li>- Swelling of the vascular endothelial cells</li> <li>- Cell infiltration (histiocytes, lymphocytes, large mononuclear cells and plasma cells)</li> <li>- Proliferation of neuroglia to form nodules.</li> <li>- Degeneration of nerve cells</li> <li>- Mild haemorrhage dispersedly in parts</li> </ul> | No description provided                                                                                                             | No lesions were observed                                                                                                                                                                                        | [27] |
| Akabane virus | Experimental (intracerebral)                     | Bovine | 2-6 month old Japanese Brown X Holstein calves       | <ul style="list-style-type: none"> <li>- Congested blood capillaries with swollen endothelial cells</li> <li>- Perivascular cuffing with large mononuclear cells, histiocytes, and lymphocytes</li> <li>- Proliferation of neuroglia to form aggregations of cells</li> </ul>                                                                   | No description provided                                                                                                             | No lesions were observed                                                                                                                                                                                        | [27] |
| Akabane virus | Natural (in-utero)                               | Bovine | Malformed newborn calves with neurologic dysfunction | No significant lesions, but in several brains: <ul style="list-style-type: none"> <li>- small focal cavitations</li> <li>- pigmented, iron-containing macrophages,</li> <li>- mild to moderate perivascular cuffing</li> </ul>                                                                                                                  | Smaller than normal with complete absence of all elements except the dorsal columns and small parts of dorsal horns.                | Mild to moderate neurogenic skeletal muscle atrophy and/or adipose tissue replacement                                                                                                                           | [28] |
| Akabane virus | Natural (in-utero)                               | Bovine | Sacrificed foetuses<br>Gestational age: 92 days      | <ul style="list-style-type: none"> <li>- Encephalomyelitis</li> <li>- Perivascular cuffing</li> <li>- Gliosis</li> </ul>                                                                                                                                                                                                                        |                                                                                                                                     | <ul style="list-style-type: none"> <li>- Polymyositis – cell infiltration and degeneration</li> </ul>                                                                                                           | [29] |

## References:

1. Yoshizawa N, Shinoto M, Katayama A, Bekku R, Inatani K. An abnormal birth in bovine suspected of being caused by Peaton virus first occurred in Shikoku region, Japan. *Journal of Veterinary Medical Science*. 2022;84(2):223-7. doi: 10.1292/jvms.21-0420.
2. Sick F, Breithaupt A, Golender N, Bumbarov V, Beer M, Wernike K. Shuni virus-induced meningoencephalitis after experimental infection of cattle. *Transboundary and Emerging Diseases*. 2021;68(3):1531-40. doi: 10.1111/tbed.13823. PubMed Central PMCID: PMC32910551.
3. Golender N, Bumbarov V, Assis I, Beer M, Khinich Y, Koren O, et al. Shuni virus in Israel: Neurological disease and fatalities in cattle. *Transboundary and Emerging Diseases*. 2019;66(3):1126-31. doi: 10.1111/tbed.13167.
4. Endalew AD, Morozov I, Davis AS, Gaudreault NN, Wernike K, Bawa B, et al. Virological and serological responses of sheep and cattle to experimental Schmallerberg virus infection. *Vector-Borne and Zoonotic Diseases*. 2018;18(12):697-703. doi: 10.1089/vbz.2018.2297.
5. Laloy E, Bréard E, Trapp S, Pozzi N, Riou M, Barc C, et al. Fetopathic effects of experimental Schmallerberg virus infection in pregnant goats. *Veterinary Microbiology*. 2017;211:141-9. doi: 10.1016/j.vetmic.2017.10.011.
6. Hirashima Y, Kitahara S, Kato T, Shirafuji H, Tanaka S, Yanase T. Congenital malformations of calves infected with Shamonda virus, southern Japan. *Emerging Infectious Diseases*. 2017;23(6):993-6. doi: 10.3201/eid2306.161946.
7. Balseiro A, Royo LJ, Gómez Antona A, García Marín JF. First Confirmation of Schmallerberg Virus in Cattle in Spain: Tissue Distribution and Pathology. *Transboundary and Emerging Diseases*. 2015;62(5):e62-e5. doi: 10.1111/tbed.12185.
8. Wisloff H, Nordvik BS, Sviland S, Tonnessen R. First documented clinical case of Schmallerberg virus in Norway: fetal malformations in a calf. *Veterinary Record*. 2014;174(5):120-+. doi: 10.1136/vr.102149. PubMed PMID: WOS:000330573100021.
9. Bayrou C, Garigliany M-M, Sarlet M, Sartelet A, Cassart D, Desmecht D. Natural Intrauterine Infection with Schmallerberg Virus in Malformed Newborn Calves. *Emerging Infectious Diseases*. 2014;20(8):1327-30. doi: 10.3201/eid2008.121890. PubMed PMID: WOS:000339864000009.
10. Oem JK, Lee KH, Kim HR, Bae YC, Chung JY, Lee OS, et al. Bovine Epizootic Encephalomyelitis caused by Akabane Virus Infection in Korea. *Journal of Comparative Pathology*. 2012;147(2-3):101-5. doi: 10.1016/j.jcpa.2012.01.013.
11. Herder V, Wohlsein P, Peters M, Hansmann F, Baumgaertner W. Salient Lesions in Domestic Ruminants Infected With the Emerging So-called Schmallerberg Virus in Germany. *Veterinary Pathology*. 2012;49(4):588-91. doi: 10.1177/0300985812447831. PubMed PMID: WOS:000305489100003.
12. Kamata H, Inai K, Maeda K, Nishimura T, Arita S, Tsuda T, et al. Encephalomyelitis of Cattle Caused by Akabane Virus in Southern Japan in 2006. *Journal of Comparative Pathology*. 2009;140(2-3):187-93. doi: 10.1016/j.jcpa.2008.12.001.
13. Lee JK, Kim JH, Park BK, Yoo HS, Lee BC, Kim DY. Akabane viral encephalitis in calves in South Korea. *Veterinary Record*. 2007;161(7):236-8. doi: 10.1136/vr.161.7.236.
14. Lee JK, Park JS, Choi JH, Park BK, Lee BC, Hwang WS, et al. Encephalomyelitis Associated with Akabane Virus Infection in Adult Cows. *Veterinary Pathology*. 2002;39(2):269-73. doi: 10.1354/vp.39-2-269.
15. Noda Y, Yokoyama H, Katsuki T, Kurashige S, Uchinuno Y, Narita M. Demonstration of Akabane virus antigen using immunohistochemistry in naturally infected newborn calves. *Veterinary Pathology*. 2001;38(2):216-8. doi: 10.1354/vp.38-2-216.
16. Uchida K, Murakami T, Sueyoshi M, Tsuda T, Inai K, Acorda JA, et al. Detection of Akabane viral antigens in spontaneous lymphohistiocytic encephalomyelitis in cattle. *Journal of Veterinary Diagnostic Investigation*. 2000;12(6):518-24. doi: 10.1177/104063870001200605.

17. Noda Y, Uchinuno Y, Shirakawa H, Nagasue S, Nagano N, Ohe R, et al. Aino virus antigen in brain lesions of a naturally aborted bovine fetus. *Veterinary Pathology*. 1998;35(5):409-11. doi: 10.1177/030098589803500511.
18. Liao YK, Lu YS, Goto Y, Inaba Y. The isolation of Akabane virus (Iriki strain) from calves in Taiwan. *Journal of Basic Microbiology*. 1996;36(1):33-9. doi: 10.1002/jobm.3620360108.
19. Miyazato S, Miura Y, Hase M, Kubo M, Goto Y, Kono Y. Encephalitis of cattle caused by Iriki isolate, a new strain belonging to Akabane virus. *Nippon juigaku zasshi The Japanese journal of veterinary science*. 1989;51(1):128-36. doi: 10.1292/jvms1939.51.128. PubMed Central PMCID: PMC2494374.
20. Parsonson IM, McPhee DA, Della-Porta AJ, McClure S, McCullagh P. Transmission of Akabane virus from the ewe to the early fetus (32 to 53 days). *Journal of Comparative Pathology*. 1988;99(2):215-27. doi: 10.1016/0021-9975(88)90073-4.
21. Kirkland PD, Barry RD, Harper PA, Zelski RZ. The development of Akabane virus-induced congenital abnormalities in cattle. *The Veterinary record*. 1988;122(24):582-6. doi: 10.1136/vr.122.24.582. PubMed Central PMCID: PMC3137718.
22. Haughey KG, Hartley WJ, Della-Porta AJ, Murray MD. Akabane disease in sheep. *Australian veterinary journal*. 1988;65(5):136-40. doi: 10.1111/j.1751-0813.1988.tb14440.x. PubMed Central PMCID: PMC3135792.
23. Konno S, Moriwaki M, Nakagawa M. Akabane Disease in Cattle: Congenital Abnormalities caused by Viral Infection. *Spontaneous Disease. Veterinary Pathology*. 1982;19(3):246-66. doi: 10.1177/030098588201900304.
24. Parsonson IM, Della-Porta AJ, Snowdon WA. Akabane virus infection in the pregnant ewe. 2. Pathology of the foetus. *Veterinary Microbiology*. 1981;6(3):209-24. doi: 10.1016/0378-1135(81)90014-6.
25. Coverdale OR, Cybinski DH, St George TD. Congenital abnormalites in calves associated with Akabane virus and Aino virus. *Australian Veterinary Journal*. 1978;54(3):151-2. doi: 10.1111/j.1751-0813.1978.tb05538.x. PubMed PMID: WOS:A1978ES96400017.
26. Parsonson IM, Della-Porta AJ, Snowdon WA. Congenital abnormalities in newborn lambs after infection of pregnant sheep with Akabane virus. *Infection and Immunity*. 1977;15(1):254-62. doi: 10.1128/iai.15.1.254-262.1977.
27. Moriwaki M, Miura Y, Hayashi S, Ishitani R. Histopathological findings of calves infected experimentally with Aino virus. *National Institute of Animal Health quarterly*. 1977;17(3):95-106. PubMed Central PMCID: PMC917129.
28. Hartley WJ, Desaram WG, Della-Porta AJ, Snowdon WA, Shepherd NC. Pathology of congenital bovine episootic arthrogryposis and hydranencephaly and its relationship to Akabane virus. *Australian Veterinary Journal*. 1977;53(7):319-25. doi: 10.1111/j.1751-0813.1977.tb00240.x. PubMed PMID: WOS:A1977DQ22200005.
29. Kurogi H, Inaba Y, Takahashi E, Sato K, Omori T, Miura Y, et al. Epizootic congenital arthrogryposis-hydranencephaly syndrome in cattle: Isolation of Akabane virus from affected fetuses. *Archives of Virology*. 1976;51(1-2):67-74. doi: 10.1007/BF01317835.
