# Supplementary material for: Revisiting the Importance of Orthobunyaviruses for Animal Health: A Scoping Review of Livestock Disease, Diagnostic Tests, and Surveillance Strategies for the Simbu Serogroup
Source: MDPI journal article supplement (doi:10.3390/v16020294), 2024-02-15
Supplement: s1 [file s1]

| Named virus   | PCR              |   | Forward primer 5' -3'     |                                                                                       | Reverse primer 5' -3' |                                     | Probe 5' -3'     |                                  | Reference |
|---------------|------------------|---|---------------------------|---------------------------------------------------------------------------------------|-----------------------|-------------------------------------|------------------|----------------------------------|-----------|
| Aino virus    | RT               | S | AISF132                   | CCCAACTCAATTC<br>GATACC                                                               | AISR780               | TTTGGAACACCAT<br>ACTGGGG            |                  |                                  | [1]       |
| Aino virus    | nested           | S | AISF313                   | CCATCGTCTCTCAG<br>GATATC                                                              | AISR657               | ACAGCATTGAAG<br>GCTGCACG            |                  |                                  | [1]       |
| Aino virus    | q-RT             |   | CommonF                   | TGACTGCAGAAGAR<br>TGGATGA                                                             | CommonR               | GAATCCA<br>GATTTGGCCCA              | AINV<br>Probe    | Cy5-<br>ATGCGTCCGTGCA-<br>BHQ2   | [2]       |
| Aino virus    | q-RT             |   | AI295F                    | GACACTGCCCTCAC<br>TCTCCAT                                                             | AI361R                | TTTACATTGGTCT<br>GCAACCCATT         | AI317-<br>FAM    | CGTCTCTCAGGATA<br>TCTAGCAA       | [3]       |
| Aino virus    | <b><u>T7</u></b> |   | AI179T                    | <b><u>TTAATACGACTCAC</u></b><br><b><u>TATAGGGAG</u></b> AAAG<br>GCCAAGATGGTACT<br>CAG | AI651L                | GCTTAGCTGCCCA<br>ACAGCAT            |                  |                                  | [3]       |
| Akabane virus |                  | S | AKSF19                    | TAACTACGCATTGC<br>AATGGC                                                              | AKSR740               | TAAGCTTAGATCT<br>GGATACC            |                  |                                  | [1]       |
| Akabane virus | nested           | S | AKSF177                   | GAAGGCCAAGATG<br>GTCTTAC                                                              | AKSR407               | GGCATCACAATTG<br>TGGCAGC            |                  |                                  | [1]       |
| Akabane virus | q-RT             |   | CommonF                   | TGACTGCAGAAGAR<br>TGGATGA                                                             | CommonR               | GAATCCAGATTTG<br>GCCCA'             | AKAV<br>Probe    | HEX-<br>TCTAAGTTGGACGC<br>A-BHQ1 | [2]       |
| Akabane virus |                  | S | AKAI206F                  | CACAACCAAGTGTC<br>GATCTTA                                                             | AKAI560R              | AAGTTGACATCCA<br>TTCCATC            |                  |                                  | [4]       |
| Akabane virus |                  | S | Akabane_<br>AB289319<br>F | GAATCCACTATTA<br>ACTACGCATTG                                                          | Akabane_A<br>B289319R | AAAGGTGTGCAC<br>CACATAGA            |                  |                                  | [5]       |
| Akabane virus |                  | S | Simbu1F                   | TCAACCAGAAGAAG<br>GCCAAGAT                                                            | Simbu1R               | GGGAAAATGGTT<br>ATTAACCACTGTA<br>AA | AKAV S2<br>Probe | TTACATAAGACGCC<br>ACAACCA        | [6]       |

| Named virus         | PCR       |   | Forward primer 5' -3' |                                                                        | Reverse primer 5' -3' |                                       | Probe 5' -3'      |                                                | Reference |
|---------------------|-----------|---|-----------------------|------------------------------------------------------------------------|-----------------------|---------------------------------------|-------------------|------------------------------------------------|-----------|
| Akabane virus       | q-RT      |   | AK151F                | GCTAGAGTCTTCTT<br>CCTCAACCAGAA                                         | AK231R                | AAAAGTAAGATC<br>GACACTTGTTGT<br>G     | AK182VIC          | CCAAGATGGTCTTA<br>CATAAG                       | [3]       |
| Akabane virus       | <b>T7</b> |   | AK100T                | <b>TTAATACGACTCAC</b><br><b>TATAGGGAG</b> AGGG<br>TATGTGGCRTTAT<br>CAG | AK619L                | TTGACTGCGTCCA<br>ACTTAGA              |                   |                                                | [3]       |
| Ingwavuma virus     |           | S | KF697141<br>F         | AGTAGTGTACTCCA<br>CWATTCAA                                             | KF697141R             | GTAGTGTGCTCCC<br>AATTCA               |                   |                                                | [5]       |
| Pan-Simbu group     |           | L | panOBV-<br>L-2959 F   | TTGGAGARTATGAR<br>GCTAARATGTG                                          | panOBV-L-<br>3274R    | 5'-<br>TGAGCACTCCATT<br>TNGACATRTC-3' |                   |                                                | [7-9]     |
| Pan-Simbu group     | q-RT      | S | Uni-S-59F             | GATGTWCCWCAAC<br>GGAAT                                                 | Uni-S-254R            | TGGGGAAAATGG<br>TTATTAAC              | Uni-S-<br>probe   | FAM-<br>GAGTCTTCTTCTCA<br>A-MGB-NFQ            | [10]      |
| Pan-Simbu group     |           | S | Simbu1 F              | TCAACCAGAAGAAG<br>GCCAAGAT                                             | Simbu1 R              | GGGAAAATGGTT<br>ATTAACCACTGTA<br>AA   | Simbu1<br>Probe   | TAAGACGGCACAAC<br>CAAGTG                       | [6]       |
| Peaton virus        |           | M | PEAV6F                | GTCGACGAGTATTG<br>CTTATCATC                                            | PEAV6R-2              | CATTGTGGACAAC<br>TTAGTTTGGC           | PEAV6<br>Probe    | AATTTAAAGTCTTG<br>TACTTGGC                     | [6]       |
| Sabo virus          |           | S | AF362396<br>F         | GTGTACTCCACTAT<br>TAACTACGTACC                                         | AF362396R             | GAATTGGCGTGTG<br>TCACATAGA            |                   |                                                | [5]       |
| Sathuperi virus     |           | S | HE795104<br>F         | CACTACTGAAATAT<br>GTCAAGCCAATTC                                        | HE795104R             | CTCAACAGAAGCC<br>TTGCAGTAT            |                   |                                                | [5]       |
| Schmallenberg virus |           | S | Common<br>F           | TGACTGCAGAAGAR<br>TGGATGA                                              | Common R              | GAATCCA<br>GATTTGGCCCA                | SBV<br>Probe      | FAM-<br>ACAGAAATAAAAAGC<br>TGCT-BHQ1-3'        | [2]       |
| Schmallenberg virus |           | M | SBV-M1-<br>213 F      | TCA ATT CAG CAA<br>GTA ACA TAC AAT<br>GG                               | SBV-M1-<br>350R       | CGT GGT CTG TCT<br>TGG TTG ATG        | SBV-M1-<br>240FAM | FAM-AAG CAC TGG<br>CCC GAA GTT TCA<br>CCT-BHQ1 | [7]       |

| Named virus         | PCR |   | Forward primer 5' -3' |                                         | Reverse primer 5' -3' |                                       | Probe 5' -3' |                                                   | Reference     |
|---------------------|-----|---|-----------------------|-----------------------------------------|-----------------------|---------------------------------------|--------------|---------------------------------------------------|---------------|
| Schmallenberg virus |     | L | SBV-L1-11 F           | TTG CCG TTT GAT<br>TTT GAA GTT GTG      | SBV-L1-155R           | TCA GGG ATC<br>GCA AAT TAA<br>AGA ACC | SBV-L1-36FAM | FAM-TCA TCC GTG<br>CTG ACC CTC TGC<br>GAG-BHQ1    | [7, 11, 12]   |
| Schmallenberg virus |     | L | SBV-L1.2 F            | TCA GAA TTG CCG<br>TTT GAT TTT GAA G    | SBV-L1.4R             | GTT GAG CGG<br>CCC AAA TAT TTC<br>C   | SBV-L1-36FAM | FAM-TCA TCC GTG<br>CTG ACC CTC TGC<br>GAG-BHQ1    | [7]           |
| Schmallenberg virus |     | S | SBV-S-382 F           | TCA GAT TGT CAT<br>GCC CCT TGC          | SBV-S-469R            | TTC GGC CCC<br>AGG TGC AAA TC         | SBV-S-408FAM | FAM-TTA AGG GAT<br>GCA CCT GGG CCG<br>ATG GT-BHQ1 | [7, 9, 11-14] |
| Shamonda virus      |     | S | NC01846 4F            | CCACTATTA ACTAC<br>AGAAATATGTCAAG<br>CC | NC018464R             | GGACCCGAAAGA<br>TGGTGA ACTA           |              |                                                   | [5]           |
| Shuni virus         |     | S | KU93731 3F            | AGTGTAYTCCACTA<br>TAGAACAAAGC           | KU937313R             | AGTGTGCTCCACA<br>TAGAACAAAT           |              |                                                   | [5]           |
| Simbu virus         |     | S | NC01847 7F            | AATGGCAAACCAAT<br>TCA                   | NC018477R             | GCGTACAACAC<br>ATAGA                  |              |                                                   | [5]           |

1. Akashi, H., et al., *Detection and differentiation of Aino and Akabane Simbu serogroup bunyaviruses by nested polymerase chain reaction*. Archives of Virology, 1999. **144**(11): p. 2101-2109.
2. Lee, J.H., et al., *Detection and differentiation of Schmallenberg, Akabane and Aino viruses by one-step multiplex reverse-transcriptase quantitative PCR assay*. BMC Veterinary Research, 2015. **11**(1).
3. Stram, Y., et al., *Detection and quantitation of Akabane and Aino viruses by multiplex real-time reverse-transcriptase PCR*. Journal of Virological Methods, 2004. **116**(2): p. 147-154.
4. Ohashi, S., et al., *Simultaneous detection of bovine arboviruses using single-tube multiplex reverse transcription-polymerase chain reaction*. Journal of Virological Methods, 2004. **120**(1): p. 79-85.
5. Camarão, A.A.R., et al., *Development and analytical validation of a group-specific RT-qPCR assay for the detection of the Simbu serogroup orthobunyaviruses*. Journal of Virological Methods, 2019. **271**.
6. Shirafuji, H., et al., *Broad-range detection of arboviruses belonging to Simbu serogroup lineage 1 and specific detection of Akabane, Aino and Peaton viruses by newly developed multiple TaqMan assays*. Journal of Virological Methods, 2015. **225**: p. 9-15.
7. Fischer, M., et al., *Development of a pan-Simbu real-time reverse transcriptase PCR for the detection of Simbu serogroup viruses and comparison with SBV diagnostic PCR systems*. Virology Journal, 2013. **10**.

8. Gurau, M.R., et al., *Studies concerning the optimisation of reverse transcription polymerase chain reaction technique of pan-Simbu virus group*. Scientific Bulletin. Series F. Biotechnologies, 2016. **20**: p. 329-332.
9. Wernike, K. and M. Beer, *International proficiency trial demonstrates reliable Schmallerberg virus infection diagnosis in endemic and non-affected countries*. PLoS ONE, 2019. **14**(6).
10. Golender, N., et al., *Development and validation of a universal S-segment-based real-time RT-PCR assay for the detection of Simbu serogroup viruses*. Journal of Virological Methods, 2018. **261**: p. 80-85.
11. De Regge, N., et al., *Schmallerberg virus circulation in Culicoides in Belgium in 2012: Field validation of a real time RT-PCR approach to assess virus replication and dissemination in midges*. PLoS ONE, 2014. **9**(1).
12. De Regge, N., et al., *Diagnosis of Schmallerberg virus infection in malformed lambs and calves and first indications for virus clearance in the fetus*. Veterinary Microbiology, 2013. **162**(2-4): p. 595-600.
13. Perera, C.L., et al., *Adaptation of a real-time RT-PCR assay for the detection of Schmallerberg virus*. Revista de Salud Animal, 2013. **35**(3): p. 201-205.
14. Aebischer, A., et al., *Rapid genome detection of Schmallerberg virus and bovine viral diarrhea virus by use of isothermal amplification methods and high-speed real-time reverse transcriptase PCR*. Journal of Clinical Microbiology, 2014. **52**(6): p. 1883-1892.
