# Supplementary material for: Revisiting the Importance of Orthobunyaviruses for Animal Health: A Scoping Review of Livestock Disease, Diagnostic Tests, and Surveillance Strategies for the Simbu Serogroup
Source: MDPI journal article supplement (doi:10.3390/v16020294), 2024-02-15
Supplement: s1 [file s1]

**Supplementary Table 2.** Data extracted from eligible publications in a scoping review to identify veterinary-important Simbu group viruses. This information was used to produce a summary of the associated disease presentations, monitoring methods, and diagnostic assays of the SGVs with veterinary importance.

| Variable         | Description                                        | Unit/Levels                                                            |
|------------------|----------------------------------------------------|------------------------------------------------------------------------|
| Authors          | The names of the authors listed on the publication | Free text list                                                         |
| Publication Date | The date for which the publication was published   | Date/Month/Year format                                                 |
| Publication Year | The year for which the publication was published   | Date/Month/Year format                                                 |
| Country          | A list of the country affiliations of the authors  | Free text list                                                         |
| Continent        | The continent in which the study was conducted     | Americas<br>Africa<br>Asia<br>Australia/Oceania<br>Europe              |
| Title            | The title of the publication                       | Free text list                                                         |
| Journal          | The name of the journal of publication             | Free text list                                                         |
| Virus name       | The Simbu group virus/es investigated              | see supplementary table 1 for the 33 viruses included in the serogroup |

**Theme: The veterinary important SGVs and the associated animal disease presentation**

|                              |                                                                                                                                                                                      |                                                                                                                                                                   |
|------------------------------|--------------------------------------------------------------------------------------------------------------------------------------------------------------------------------------|-------------------------------------------------------------------------------------------------------------------------------------------------------------------|
| Study type                   | Study type/design                                                                                                                                                                    | Descriptive<br>Observational<br>Experimental<br>Theoretical                                                                                                       |
| Infection type               | Natural exposure or experimental challenge                                                                                                                                           | Natural<br>Experimental                                                                                                                                           |
| Case definition <sup>1</sup> | Diagnostic criterion applied to recruit cases into this review to provide a systematic description of disease presentations associated with SGV infection                            | Clinical presentation only<br>Antibody detection only<br>Agent detection only<br>Consistent clinical presentation with confirmation of viral infection with a SGV |
| Diagnostic test              | Test type(s) utilized for confirmation of disease due to the virus of interest                                                                                                       | Free text list                                                                                                                                                    |
| Start                        | The start date of the period of observation                                                                                                                                          | Date/Month/Year format                                                                                                                                            |
| End                          | The end date of the period of observation                                                                                                                                            | Date/Month/Year format                                                                                                                                            |
| Season                       | The season in which the observations of animal disease occurred.<br>The date of disease report was used to determine the season based on the period and location of the observation. | Summer<br>Autumn<br>Spring<br>Winter                                                                                                                              |
| Host species                 | Species of animal host with disease                                                                                                                                                  | Bovine<br>Ovine<br>Caprine<br>Porcine<br>Equine                                                                                                                   |
| Host age group <sup>2</sup>  | Age group of the animal host with disease                                                                                                                                            | Foetal: unborn<br>Juvenile: born to <12 months of age<br>Adult: 12 months of age                                                                                  |

|                                    |                                                                                         |                                                                                                                                       |
|------------------------------------|-----------------------------------------------------------------------------------------|---------------------------------------------------------------------------------------------------------------------------------------|
| Disease system <sup>2</sup>        | The organ system involved                                                               | Circulatory<br>Respiratory<br>Gastrointestinal<br>Musculoskeletal<br>Nervous<br>Urinary<br>Reproductive<br>Congenital<br>Non-specific |
| Clinical signs <sup>2</sup>        | A list of all clinical signs reported                                                   | Free text list                                                                                                                        |
| Frequency of clinical signs listed | The count of the observations of clinical signs by the number of cases                  | Numeric                                                                                                                               |
| Differentials considered           | What other diseases were considered                                                     | Free text list                                                                                                                        |
| Diagnostic tests                   | Assay types used to diagnose the virus of interest                                      | Free text list                                                                                                                        |
| Histopathological description      | The inclusion of histopathological description of disease                               | Yes<br>No                                                                                                                             |
| Economic losses estimated          | The inclusion of an estimate or economic assessment of the impact of associated disease | Yes, with information collected in a free text list<br>No                                                                             |

<sup>1</sup> This assessment was completed to ensure that cases of clinical disease described was confirmed to be a result of infection with the virus of interest. The four diagnostic criteria are based on the unified case definitions proposed by European agencies during data collection for the Schmallenberg virus epidemic [21]. The diagnostic challenge in identifying a SGV as a cause of disease were exemplified by the different and varying case definitions used by affected countries during the outbreak in Europe. In January 2012, different countries had varying criteria for what constituted a confirmed case following Schmallenberg virus infection. These criteria depended on factors such as the age of the host (offspring or adult) or the location of the infection (within or outside the known range). Additionally, laboratory confirmation of the viral infection was achieved through a variety of agent and/or antibody tests.

<sup>2</sup> To provide a distinction between maternal and foetal outcomes of infection, clinical signs relating to reproductive and neurological disease were categorised given the context provided from the host age group. This allowed for congenital disease to be considered as a foetal outcome and reproductive disease to be measured as a maternal effect.

#### Theme: Diagnostic tests – development and validation studies

|                 |                                                                                                                                  |                                                                                                                                                                                           |
|-----------------|----------------------------------------------------------------------------------------------------------------------------------|-------------------------------------------------------------------------------------------------------------------------------------------------------------------------------------------|
| Test scenario   | Reason for testing                                                                                                               | Monitoring populations for infection/exposure<br>Diagnosis in animals where disease is suspected                                                                                          |
| Sample types    | List of the samples utilized in test development or validation                                                                   | Free text list                                                                                                                                                                            |
| Test types      | List of the test types investigated                                                                                              | Free text list                                                                                                                                                                            |
| Test level      | Test is designed to detect SGVs either at a group level or to differentiate a specific named virus                               | Group<br>Virus                                                                                                                                                                            |
| Test target     | Test designed for serology or agent detection                                                                                    | Serology<br>Agent                                                                                                                                                                         |
| Test details    | Details such as the test manufacturer, reagents, primer, and probe sequences                                                     | Free text list                                                                                                                                                                            |
| Test validation | If the assay has undergone validation and if so, to which stage along the validation pathway as defined by WOAHP guidelines [22] | None: No validation data provided<br>Stage 1: Analytical characteristics<br>Stage 2: Diagnostic characteristics and cut-off values<br>Stage 3: Reproducibility<br>Stage 4: Implementation |

#### Theme: Monitoring methods

|             |                                                |                                                          |
|-------------|------------------------------------------------|----------------------------------------------------------|
| Virus       | Simbu group virus of interest for the activity | Free text list                                           |
| Survey Area | Area of interest for the study                 | Local region (intra-country)<br>Country<br>Multinational |

|                             |                                                                                                                                                                                                                                                          |                                                                                     |
|-----------------------------|----------------------------------------------------------------------------------------------------------------------------------------------------------------------------------------------------------------------------------------------------------|-------------------------------------------------------------------------------------|
|                             |                                                                                                                                                                                                                                                          | Continent                                                                           |
| Survey location             | Details of the country and region where the activity occurred                                                                                                                                                                                            | Free text list                                                                      |
| Survey period               | Length of time over the course of the study                                                                                                                                                                                                              | Numeric (months)                                                                    |
| Sample collection           | The type sample collection used in the study:<br>Active if the samples were primarily collected for the surveillance activity.<br>Passive if the samples were collected for another purpose (diagnostic investigation or a non-SGV surveillance program) | Active<br>Passive                                                                   |
| Survey test                 | Test type(s) utilized in the monitoring activity                                                                                                                                                                                                         | Free text list                                                                      |
| Animal                      | Animal species from where samples were collected from                                                                                                                                                                                                    | Free text list                                                                      |
| Sample frequency            | Frequency of sampling used for the study                                                                                                                                                                                                                 | Single<br>Serial – repeated/ daily/ weekly/ monthly/ quarterly/<br>Yearly<br>Paired |
| Sample size calculation     | If sample size calculations were considered and the details of the:<br>- Anticipated prevalence<br>- Allowable error<br>- Level of confidence                                                                                                            | Yes/No<br><br>Numeric for the information on the sample size calculation            |
| Sample size                 | Sample size                                                                                                                                                                                                                                              | Numeric                                                                             |
| Seroprevalence <sup>3</sup> | Reported seroprevalence in each study was charted by:<br>- Country<br>- Animal species<br>- Simbu group virus                                                                                                                                            | Numeric                                                                             |

<sup>3</sup> A quantitative summary of seroprevalence by country, animal species, and Simbu group virus was prepared using R with data extracted (Supplementary Figure 1).
